# Supplementary material for: Nomogram Based on Dual-Layer Spectral Detector CTA Parameter for the Prediction of Infarct Core in Patients with Acute Ischemic Stroke
Source: MDPI journal article supplement (doi:10.3390/diagnostics13223434), 2023-11-13
Supplement: s1 [file s1]

Table S1. Comparison of CTA and CTP imaging scanning parameters in the examination of AIS using dual-layer spectral detector CT

| Parameters              | CTA   | CTP   |
|-------------------------|-------|-------|
| Layer thickness (mm)    | 5     | 5     |
| Interlayer spacing (mm) | 5     | 5     |
| Collimator width (mm)   | 40    | 40    |
| Tube voltage (kV)       | 120   | 120   |
| Tube current (mAs)      | 109   | 40    |
| CTDIvol (mGy)           | 28.1  | 103.5 |
| DLP (mGy*cm)            | 516.3 | 875   |

CTDI, CT Dose Index; DLP, dose length product.
